# Supplementary material for: Novel molecular adducts of an anti-cancer drug vandetanib with enhanced solubility
Source: Royal Society of Chemistry journal article supplement (doi:10.1039/d3ce01130e), 2023-12-22
Supplement: d3ce01130e1.pdf [file d3ce01130e1.pdf]

## Novel Molecular Adducts of An Anti-cancer Drug Vandetanib with Enhanced Solubility

Ravi Kumar Bandaru,<sup>a</sup> Lopamudra Giri,<sup>a</sup> Gamidi Rama Krishna,<sup>\*b</sup> and Rambabu Dandela<sup>\*a</sup>

<sup>a</sup>Department of Industrial and Engineering Chemistry, Institute of Chemical Technology-Indian Oil Bhubaneswar Campus, Bhubaneswar, India. E-mail: [r.dandela@iocb.ictmumbai.edu.in](mailto:r.dandela@iocb.ictmumbai.edu.in) <sup>b</sup>Organic Chemistry Division, CSIR-National Chemical Laboratory, Dr. Homi Bhabha Road, Pune 411008, India Email: [rk.gamidi@ncl.res.in](mailto:rk.gamidi@ncl.res.in)

### Table of Figures:

|                                                                                                     |    |
|-----------------------------------------------------------------------------------------------------|----|
| Figure S1: ORTEP diagrams of VDTB and its molecular salts .....                                     | 2  |
| Figure S2: Packing diagram of VDTB .....                                                            | 3  |
| Figure S3: Packing diagram of VDTB: SUA .....                                                       | 3  |
| Figure S4: Packing diagram of VDTB: ADA: 3H <sub>2</sub> O .....                                    | 4  |
| Figure S5: Packing diagram of VDTB: PIA: 1.25H <sub>2</sub> O .....                                 | 4  |
| Figure S6: 2D sheet structure of VDTB: H <sub>2</sub> O chains in VDTB: AZA: H <sub>2</sub> O ..... | 5  |
| Figure S7: Packing diagram of VDTB: AZA: H <sub>2</sub> O .....                                     | 5  |
| Figure S8: Packing diagram of VDTB: SBA .....                                                       | 6  |
| Figure S9: PXRD patterns of VDTB and its molecular salts before and after DVS .....                 | 8  |
| Figure S10: PXRD phase comparison of VDTB equilibrium solubility residues .....                     | 9  |
| Figure S11: UV absorption spectrum and calibration curve of VDTB .....                              | 10 |

### List of Tables:

|                                                                           |    |
|---------------------------------------------------------------------------|----|
| Table S1: Hydrogen bond distances and angle of VDTB molecular salts ..... | 6  |
| Table S2: TGA weight loss data of VDTB molecular salts .....              | 8  |
| Table S3: Equilibrium solubility of VDTB in its molecular salts .....     | 10 |
| Table S4: Intrinsic dissolution rate study of VDTB solid forms .....      | 10 |
| Table S5: pH of the supernatant solution after equilibration study .....  | 12 |

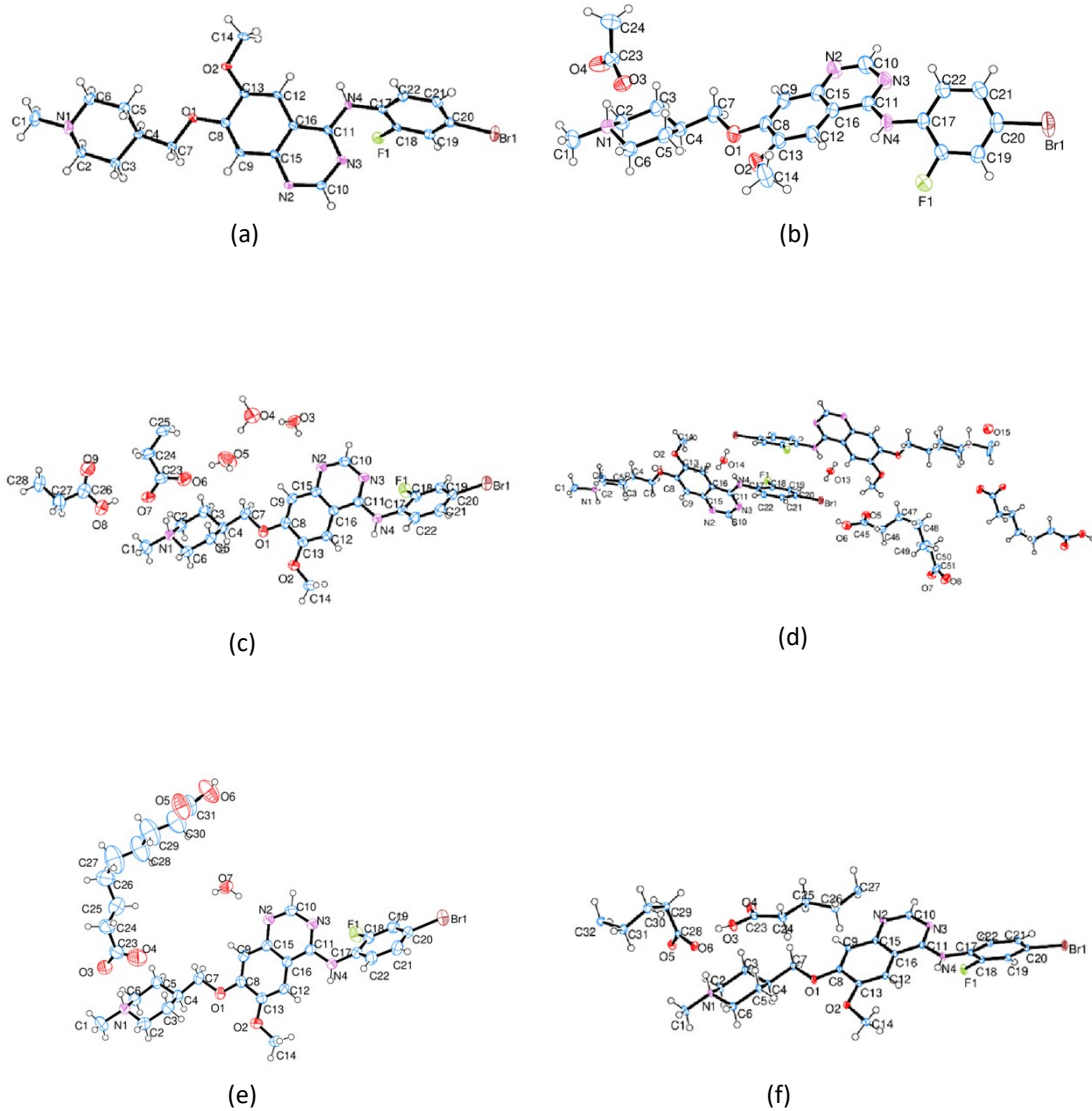

**Figure S1.** ORTEP diagrams of (a) VDTB, (b) VDTB: SUA, (c) VDTB: ADA: 3H<sub>2</sub>O, (d) VDTB: PIA: 1.25H<sub>2</sub>O, (e) VDTB: AZA: H<sub>2</sub>O, (f) VDTB: SBA. Herein, the ellipsoids are drawn with a 50% probability.

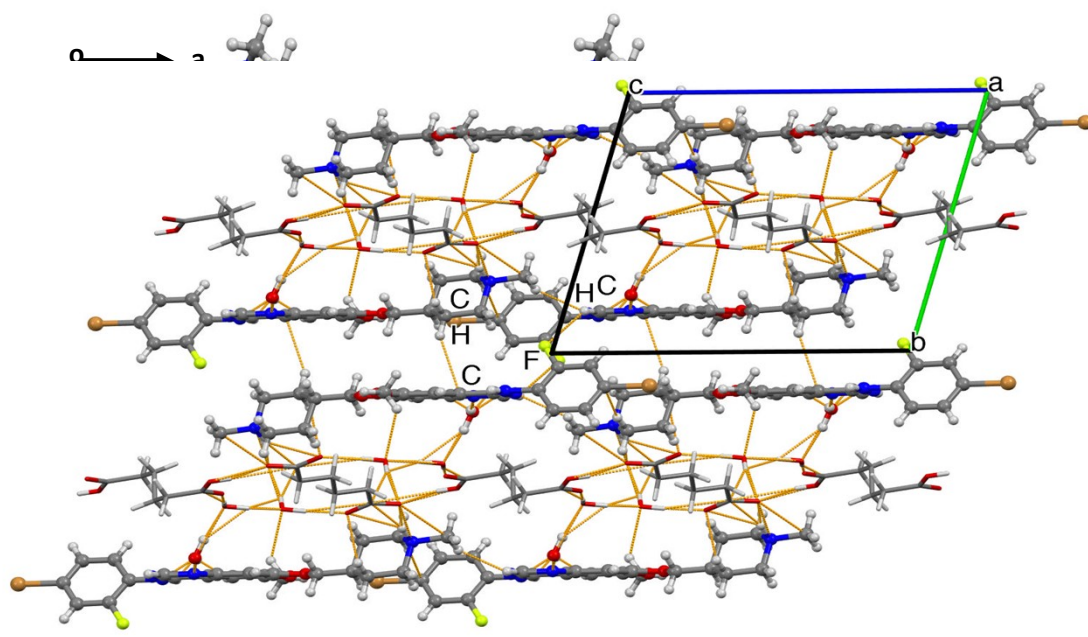

**Figure S4.** Packing diagram of VDTB: ADA: 3H<sub>2</sub>O, showing C-H...π and C-H...F short contact interactions.

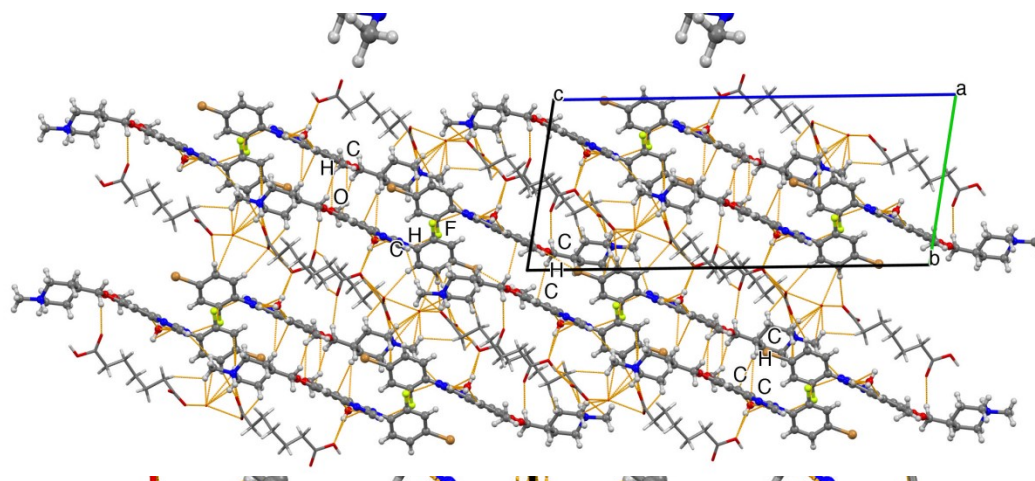

**Figure S5.** Packing diagram of VDTB: PIA: 1.25H<sub>2</sub>O, showing C-H...F, C-H...O and C-H...π short contact interactions.

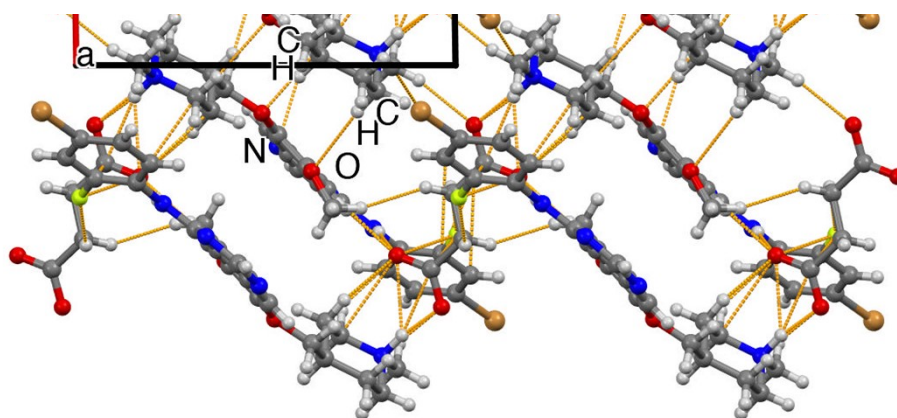

**Figure S3.** Packing diagram of VDTB: SUA, showing C-H...N and C-H...O short contact interactions.

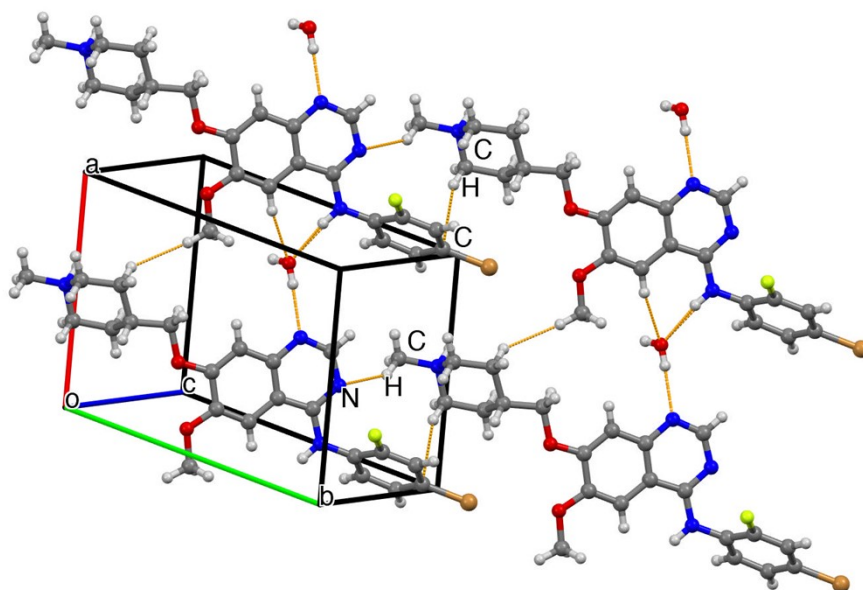

**Figure S6.** 2D sheet structure formed by the C–H $\cdots$ N and C–H $\cdots$  $\pi$  interaction between VDTB: H<sub>2</sub>O chains in VDTB: AZA: H<sub>2</sub>O.

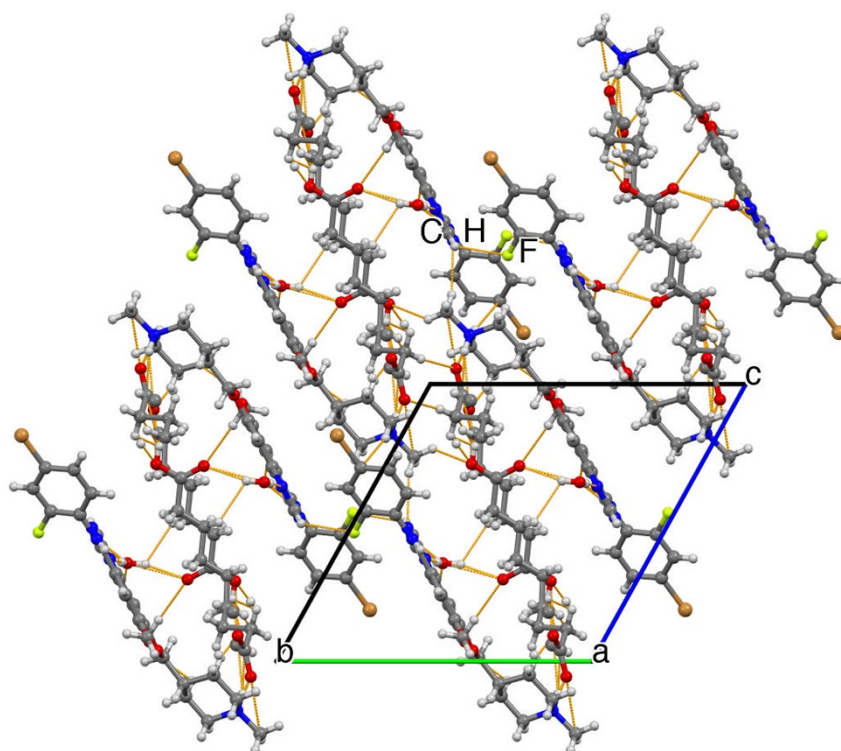

**Figure S7.** Packing diagram of VDTB: AZA: H<sub>2</sub>O, showing C–H $\cdots$ F short contact interactions.

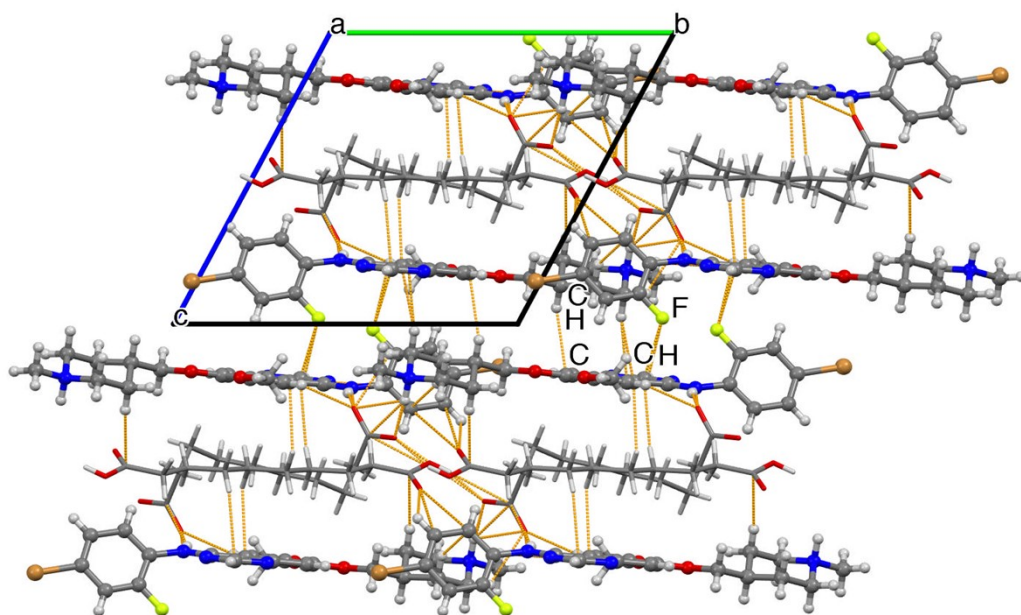

**Figure S8.** Packing diagram of VDTB: SBA showing C–H...C and C–H...F short contact interactions.

**Table S1.** Hydrogen bond distances (Å) and angles (°) of the molecular salts of VDTB.

| D–H...A                           | D–H (Å)              | H...A (Å) | D...A (Å) | D–H...A (°) |
|-----------------------------------|----------------------|-----------|-----------|-------------|
| <b>VDTB</b>                       |                      |           |           |             |
| N4–H4...N2#1                      | 0.86                 | 2.08      | 2.902(5)  | 158.6       |
| #1                                | x-1/4, -y+3/4, z+1/4 |           |           |             |
| <b>VDTB: ADA: 3H<sub>2</sub>O</b> |                      |           |           |             |
| N1–H1...O7                        | 0.98                 | 1.74      | 2.677(3)  | 157.6       |
| O3–H1I...N2                       | 0.70(5)              | 2.18(5)   | 2.875(3)  | 167.0(5)    |
| N4–H4A...O3#1                     | 0.86                 | 2.09      | 2.844(3)  | 146.5       |
| O5–H1F...O7#3                     | 0.76(5)              | 2.22(5)   | 2.971(4)  | 171.0(5)    |
| O8–H8...O7                        | 0.82                 | 1.82      | 2.602(3)  | 158.9       |
| O5–H1G...O6                       | 0.95(4)              | 1.78(5)   | 2.712(4)  | 170.0(4)    |
| O4–H1E...O5                       | 0.99(3)              | 1.75(3)   | 2.723(4)  | 165.0(4)    |
| O4–H1D...O9#2                     | 1.01(3)              | 1.84(3)   | 2.849(4)  | 177.0(4)    |
| O3–H1H...O4                       | 0.90(4)              | 1.91(5)   | 2.783(4)  | 163.0(4)    |
| #1                                | x+1, y, z            |           |           |             |
| #2                                | -x, -y+1, -z+1       |           |           |             |
| #3                                | -x+1, -y+1, -z+1     |           |           |             |
| <b>VDTB: AZA: H<sub>2</sub>O</b>  |                      |           |           |             |
| N1–H1...O3                        | 0.98                 | 1.69      | 2.618(4)  | 157         |
| O7–H1E...N2                       | 0.81(5)              | 2.03(5)   | 2.840(4)  | 176.0(5)    |
| N4–H4...O7#1                      | 0.86                 | 2.04      | 2.878(4)  | 162.9       |
| O7–H1D...O5#2                     | 0.81(5)              | 2.08(5)   | 2.858(4)  | 162.0(5)    |
| O6–H6...O4#2                      | 0.82                 | 1.7       | 2.496(5)  | 161.8       |
| #1                                | x+1, y, z            |           |           |             |

|                                     |                  |         |            |          |
|-------------------------------------|------------------|---------|------------|----------|
| #2                                  | -x, -y+1, -z+1   |         |            |          |
| <b>VDTB: SBA</b>                    |                  |         |            |          |
| N1-H1...O6                          | 1                | 1.66    | 2.6579(15) | 173.7    |
| O3-H3...O6                          | 0.85             | 1.83    | 2.6457(14) | 162.2    |
| N4-H4...O5#1                        | 0.88             | 1.93    | 2.7879(14) | 163.9    |
| #1                                  | x, y-1, z        |         |            |          |
| <b>VDTB: SUA</b>                    |                  |         |            |          |
| N1-H1...O4                          | 0.98             | 1.66    | 2.633(3)   | 170.6    |
| N4-H4...O3#1                        | 0.86             | 1.99    | 2.823(3)   | 164.4    |
| #1                                  | -x+1, -y+1, -z+1 |         |            |          |
| <b>VDTB: PIA:1.25H<sub>2</sub>O</b> |                  |         |            |          |
| N1-H1...O9#5                        | 0.98             | 1.73    | 2.704(5)   | 174.9    |
| O14-H1E...N2#1                      | 0.77(4)          | 2.03(4) | 2.788(4)   | 171.0(5) |
| N4-H1D...O14                        | 0.85(4)          | 2.02(5) | 2.851(4)   | 167.0(5) |
| N5-H5...O8#2                        | 0.98             | 1.78    | 2.704(5)   | 156.2    |
| O13-H1H...N6#6                      | 0.87(4)          | 1.93(4) | 2.790(4)   | 174.0(4) |
| N8-H1EE...O13                       | 0.92(4)          | 1.96(5) | 2.851(4)   | 165.0(4) |
| O12-H1J...O9#8                      | 0.95(5)          | 1.58(5) | 2.516(4)   | 170.0(5) |
| O14-H1G...O12#3                     | 0.80(5)          | 2.12(5) | 2.856(5)   | 154.0(5) |
| O6-H1F...O7#7                       | 0.86(5)          | 1.70(5) | 2.521(5)   | 160.0(5) |
| O13-H1I...O6#4                      | 0.70(5)          | 2.18(5) | 2.858(5)   | 164.0(6) |
| #1                                  | x-1, y, z        |         |            |          |
| #2                                  | x-1, y+1, z      |         |            |          |
| #3                                  | x, y, z-1        |         |            |          |
| #4                                  | x, y+1, z        |         |            |          |
| #5                                  | x+1, y, z-1      |         |            |          |
| #6                                  | x+1, y, z        |         |            |          |
| #7                                  | -x+1, -y, -z+1   |         |            |          |
| #8                                  | -x+1, -y+1, -z+2 |         |            |          |

**Table S2.** Details of the temperature range and the accompanying TGA weight loss of VDTB and its respective salt forms.

| Solid form                      | Molecular weight of empirical formula | % wight of H <sub>2</sub> O | Experimental weight loss % observed TGA | Inference                             |
|---------------------------------|---------------------------------------|-----------------------------|-----------------------------------------|---------------------------------------|
| VDTB                            | 475.35                                | -                           | 0.4                                     | Negligible (due to adsorbed moisture) |
| VDTB: ADA: 3H <sub>2</sub> O    | 675.54                                | 7.99                        | 7.23                                    | Complies                              |
| VDTB: AZA: H <sub>2</sub> O     | 681.59                                | 2.64                        | 2.72                                    | Complies                              |
| VDTB: PIA: 1.25H <sub>2</sub> O | 657.53                                | 3.42                        | 3.46                                    | Complies                              |
| VDTB: SBA                       | 677.60                                | -                           | -                                       | -                                     |
| VDTB: SUA                       | 566.40                                | -                           | -                                       | -                                     |

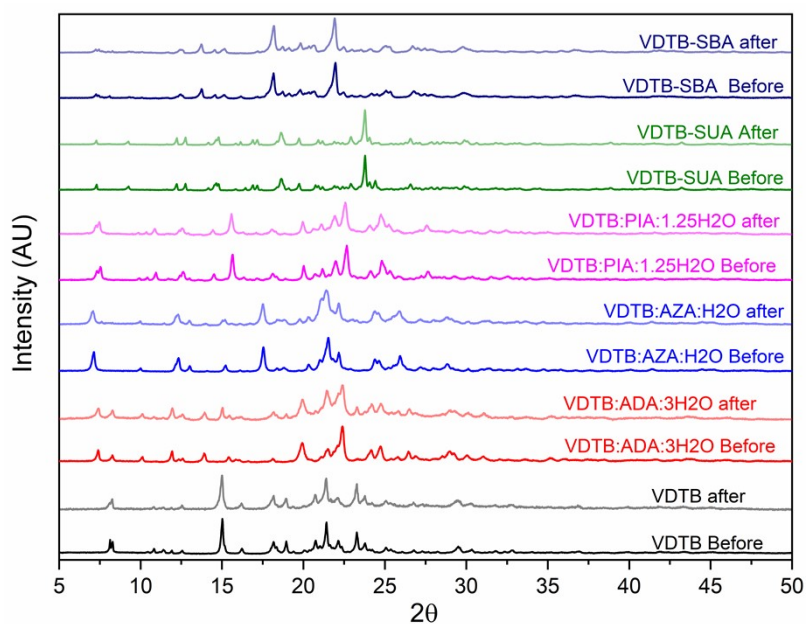

**Figure S9.** PXRD patterns of VDTB and its molecular salts before and after DVS.

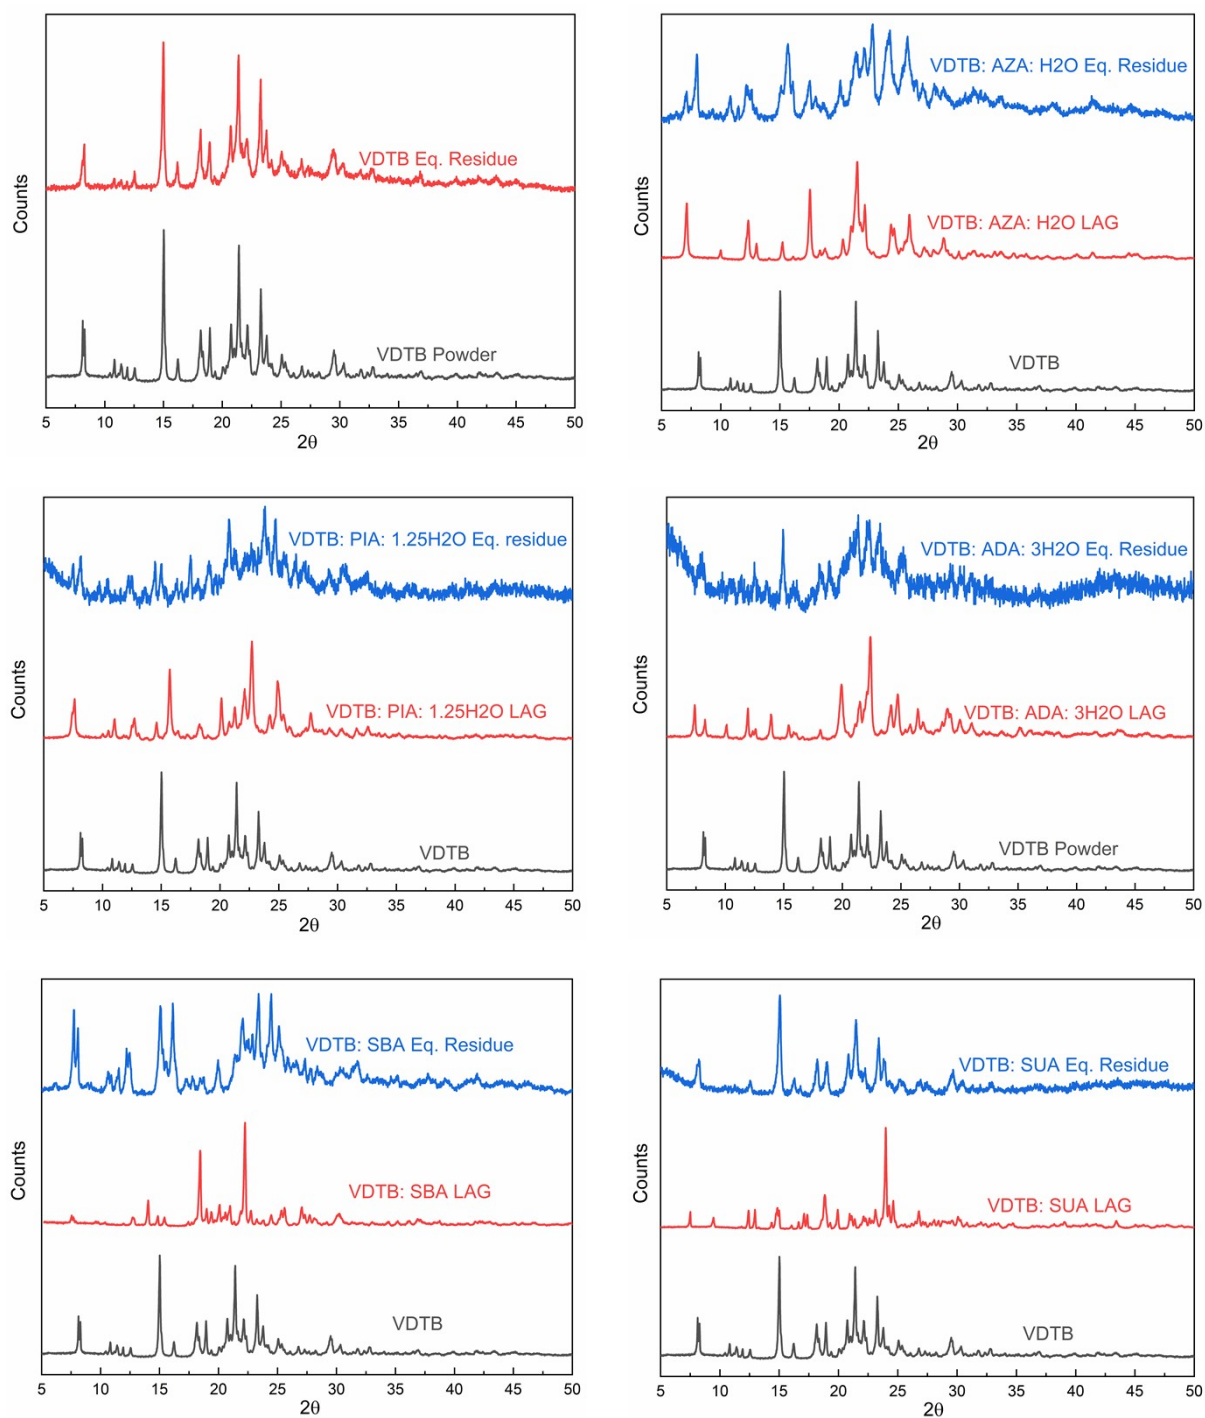

**Figure S10.** PXR D phase comparison of equilibrium solubility residues of VDTB and its molecular salts.



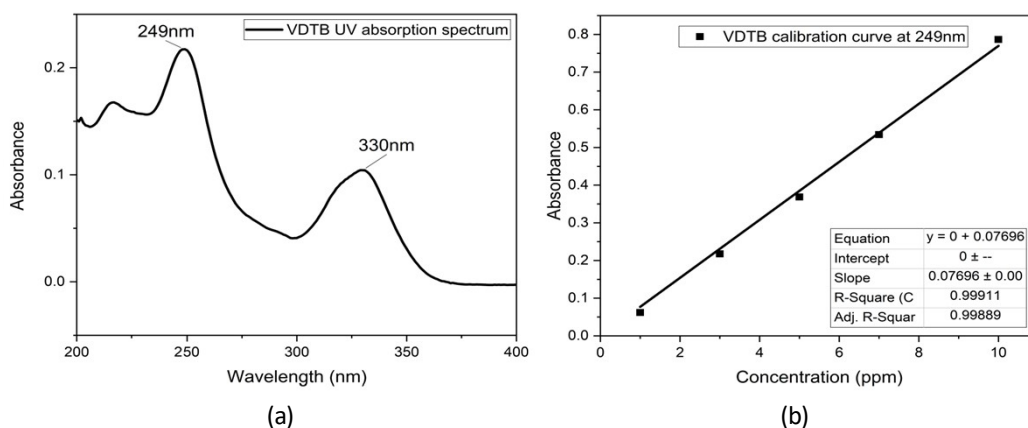

**Figure S11.** a) UV absorption spectrum of VDTB. (b) calibration curve at 249 nm.

**Table S3.** Equilibrium solubility of VDTB in its molecular salts.

| S. No | Sample name                         | Solubility of VDTB at pH 7.4 ( $\mu\text{g/mL}$ ) |
|-------|-------------------------------------|---------------------------------------------------|
| 1     | VDTB                                | $61.3 \pm 3.3$                                    |
| 2     | VDTB: SUA                           | $261.0 \pm 3.1$                                   |
| 3     | VDTB: ADA: $3\text{H}_2\text{O}$    | $313.6 \pm 8.1$                                   |
| 4     | VDTB: PIA: $1.25\text{H}_2\text{O}$ | $608.1 \pm 11.5$                                  |
| 5     | VDTB: AZA: $\text{H}_2\text{O}$     | $220.8 \pm 5.7$                                   |
| 6     | VDTB: SBA                           | $19.3 \pm 0.7$                                    |

**Table S4.** Intrinsic dissolution data of VDTB and its salt forms in phosphate buffer (pH 7.4).

| VDTB    |            |                            |                                  |                       |           |         |        |        |
|---------|------------|----------------------------|----------------------------------|-----------------------|-----------|---------|--------|--------|
| Time(h) | Absorbance | Conc. ( $\mu\text{g/mL}$ ) | Amount in 1 mL ( $\mu\text{g}$ ) | Amount in 400 mL (mg) | Loss (mg) | CLA(mg) | CDR    | %CDR   |
| 0.5     | 0          | 0                          | 0                                | 0                     | 0         | 0       | 0      | 0      |
| 1       | 0          | 0                          | 0                                | 0                     | 0         | 0       | 0      | 0      |
| 1.5     | 0.023      | 0.298                      | 7.467                            | 2.987                 | 0.007     | 0       | 2.987  | 1.493  |
| 2       | 0.027      | 0.350                      | 8.766                            | 3.506                 | 0.008     | 0.007   | 3.513  | 1.756  |
| 4       | 0.031      | 0.402                      | 10.064                           | 4.025                 | 0.010     | 0.016   | 4.042  | 2.021  |
| 6       | 0.042      | 0.545                      | 13.636                           | 5.454                 | 0.013     | 0.026   | 5.480  | 2.740  |
| 12      | 0.091      | 1.181                      | 29.545                           | 11.818                | 0.029     | 0.039   | 11.858 | 5.929  |
| 14      | 0.178      | 2.311                      | 57.792                           | 23.116                | 0.057     | 0.069   | 23.186 | 11.593 |
| 18      | 0.269      | 3.493                      | 87.337                           | 34.935                | 0.087     | 0.127   | 35.062 | 17.531 |
| 22      | 0.344      | 4.467                      | 111.688                          | 44.675                | 0.111     | 0.214   | 44.889 | 22.444 |

| VDTB: SUA |
|-----------|
|-----------|

| Time(h ) | Absorbance | Conc.(µg/mL) | Amount in 1 mL (µg) | Amount in 400 mL (mg) | Loss (mg) | CLA(mg) | CDR    | %CDR   |
|----------|------------|--------------|---------------------|-----------------------|-----------|---------|--------|--------|
| 0.5      | 0.01       | 0.129        | 3.246               | 1.298                 | 0.003     | 0       | 1.298  | 0.649  |
| 1        | 0.024      | 0.311        | 7.792               | 3.116                 | 0.007     | 0.003   | 3.120  | 1.560  |
| 1.5      | 0.056      | 0.727        | 18.181              | 7.272                 | 0.018     | 0.011   | 7.283  | 3.641  |
| 2        | 0.077      | 1            | 25                  | 10                    | 0.025     | 0.029   | 10.029 | 5.014  |
| 4        | 0.087      | 1.129        | 28.246              | 11.298                | 0.028     | 0.054   | 11.352 | 5.676  |
| 6        | 0.119      | 1.545        | 38.636              | 15.454                | 0.038     | 0.082   | 15.537 | 7.768  |
| 12       | 0.331      | 4.298        | 107.467             | 42.987                | 0.107     | 0.121   | 43.108 | 21.554 |
| 14       | 0.428      | 5.5584       | 138.961             | 55.584                | 0.138     | 0.228   | 55.812 | 27.906 |
| 18       | 0.513      | 6.662        | 166.558             | 66.623                | 0.166     | 0.367   | 66.990 | 33.495 |
| 22       | 0.673      | 8.740        | 218.506             | 87.402                | 0.218     | 0.534   | 87.936 | 43.968 |

**VDTB: ADA: 3H<sub>2</sub>O**

| Time(h) | Absorbance | Conc.(µg/mL) | Amount in 1 mL (µg) | Amount in 400 mL (mg) | Loss (mg) | CLA(mg) | CDR    | %CDR   |
|---------|------------|--------------|---------------------|-----------------------|-----------|---------|--------|--------|
| 0.5     | 0.011      | 0.142        | 3.571               | 1.428                 | 0.003     | 0       | 1.428  | 0.714  |
| 1       | 0.046      | 0.597        | 14.935              | 5.974                 | 0.014     | 0.003   | 5.977  | 2.988  |
| 1.5     | 0.071      | 0.922        | 23.051              | 9.220                 | 0.023     | 0.018   | 9.239  | 4.619  |
| 2       | 0.112      | 1.454        | 36.363              | 14.545                | 0.036     | 0.041   | 14.587 | 7.293  |
| 4       | 0.259      | 3.363        | 84.090              | 33.636                | 0.084     | 0.077   | 33.714 | 16.857 |
| 6       | 0.368      | 4.779        | 119.480             | 47.792                | 0.119     | 0.162   | 47.954 | 23.977 |
| 12      | 0.432      | 5.610        | 140.259             | 56.103                | 0.140     | 0.281   | 56.385 | 28.192 |
| 14      | 0.567      | 7.363        | 184.090             | 73.636                | 0.184     | 0.421   | 74.058 | 37.029 |
| 18      | 0.661      | 8.584        | 214.610             | 85.844                | 0.214     | 0.605   | 86.45  | 43.225 |
| 22      | 0.752      | 9.766        | 244.155             | 97.662                | 0.244     | 0.820   | 98.482 | 49.241 |

**VDTB: PIA: 1.25H<sub>2</sub>O**

| Time(h) | Absorbance | Conc.(µg/mL) | Amount in 1 mL (µg) | Amount in 400 mL (mg) | Loss (mg) | CLA(mg) | CDR     | %CDR   |
|---------|------------|--------------|---------------------|-----------------------|-----------|---------|---------|--------|
| 0.5     | 0.093      | 1.207        | 30.194              | 12.077                | 0.030     | 0       | 12.077  | 6.038  |
| 1       | 0.116      | 1.506        | 37.662              | 15.064                | 0.037     | 0.030   | 15.095  | 7.547  |
| 1.5     | 0.265      | 3.441        | 86.038              | 34.415                | 0.086     | 0.067   | 34.483  | 17.241 |
| 2       | 0.467      | 6.064        | 151.623             | 60.649                | 0.151     | 0.153   | 60.803  | 30.401 |
| 4       | 0.763      | 9.909        | 247.727             | 99.090                | 0.247     | 0.305   | 99.396  | 49.698 |
| 6       | 0.985      | 12.792       | 319.805             | 127.922               | 0.319     | 0.553   | 128.475 | 64.237 |
| 12      | 1.184      | 15.376       | 384.415             | 153.766               | 0.384     | 0.873   | 154.639 | 77.319 |
| 14      | 1.213      | 15.753       | 393.831             | 157.532               | 0.393     | 1.257   | 158.789 | 79.394 |
| 18      | 1.228      | 15.948       | 398.701             | 159.480               | 0.398     | 1.651   | 161.131 | 80.565 |
| 22      | 1.224      | 15.896       | 397.402             | 158.961               | 0.397     | 2.05    | 161.011 | 80.505 |

**VDTB: AZA: H<sub>2</sub>O**

| Time(h) | Absorbance | Conc.(µg/mL) | Amount in 1 mL (µg) | Amount in 400 mL (mg) | Loss (mg) | CLA(mg) | CDR | %CDR |
|---------|------------|--------------|---------------------|-----------------------|-----------|---------|-----|------|
|---------|------------|--------------|---------------------|-----------------------|-----------|---------|-----|------|

|     |       |       |         |        |       |       |        |        |
|-----|-------|-------|---------|--------|-------|-------|--------|--------|
| 0.5 | 0     | 0     | 0       | 0      | 0     | 0     | 0      | 0      |
| 1   | 0.02  | 0.259 | 6.493   | 2.597  | 0.006 | 0     | 2.597  | 1.298  |
| 1.5 | 0.048 | 0.623 | 15.584  | 6.233  | 0.015 | 0.006 | 6.240  | 3.120  |
| 2   | 0.059 | 0.766 | 19.155  | 7.662  | 0.019 | 0.022 | 7.684  | 3.842  |
| 4   | 0.073 | 0.948 | 23.701  | 9.480  | 0.023 | 0.041 | 9.521  | 4.760  |
| 6   | 0.093 | 1.207 | 30.194  | 12.077 | 0.030 | 0.064 | 12.142 | 6.071  |
| 12  | 0.126 | 1.636 | 40.909  | 16.363 | 0.040 | 0.095 | 16.458 | 8.229  |
| 14  | 0.297 | 3.857 | 96.428  | 38.571 | 0.096 | 0.136 | 38.707 | 19.353 |
| 18  | 0.428 | 5.558 | 138.961 | 55.584 | 0.138 | 0.232 | 55.816 | 27.908 |
| 22  | 0.611 | 7.935 | 198.376 | 79.350 | 0.198 | 0.371 | 79.722 | 39.861 |

| VDTB: SBA |            |              |                     |                       |           |         |        |       |
|-----------|------------|--------------|---------------------|-----------------------|-----------|---------|--------|-------|
| Time(h)   | Absorbance | Conc.(µg/mL) | Amount in 1 mL (µg) | Amount in 400 mL (mg) | Loss (mg) | CLA(mg) | CDR    | %CDR  |
| 0.5       | 0          | 0            | 0                   | 0                     | 0         | 0       | 0      | 0     |
| 1         | 0          | 0            | 0                   | 0                     | 0         | 0       | 0      | 0     |
| 1.5       | 0          | 0            | 0                   | 0                     | 0         | 0       | 0      | 0     |
| 2         | 0.024      | 0.311        | 7.792               | 3.116                 | 0.007     | 0       | 3.116  | 1.558 |
| 4         | 0.027      | 0.350        | 8.766               | 3.506                 | 0.008     | 0.007   | 3.514  | 1.757 |
| 6         | 0.03       | 0.389        | 9.740               | 3.896                 | 0.009     | 0.016   | 3.912  | 1.956 |
| 12        | 0.062      | 0.805        | 20.129              | 8.051                 | 0.020     | 0.026   | 8.078  | 4.039 |
| 14        | 0.088      | 1.142        | 28.571              | 11.428                | 0.028     | 0.046   | 11.475 | 5.737 |
| 18        | 0.113      | 1.467        | 36.688              | 14.675                | 0.036     | 0.075   | 14.750 | 7.375 |
| 22        | 0.153      | 1.987        | 49.675              | 19.870                | 0.049     | 0.111   | 19.981 | 9.990 |

**Table S5.** pH of the supernatant solution after equilibration period.

| Compound                        | pH observed |
|---------------------------------|-------------|
| VDTB                            | 7.40 ± 0.02 |
| VDTB: SUA                       | 6.93        |
| VDTB: ADA: 3H <sub>2</sub> O    | 6.92        |
| VDTB: PIA: 1.25H <sub>2</sub> O | 6.98        |
| VDTB: AZA: H <sub>2</sub> O     | 6.98        |
| VDTB: SBA                       | 7.00        |
